# Supplementary material for: The crystal structure of Li2B3PO8with the 2D-linkage of BO3, BO4and PO4groups
Source: Royal Society of Chemistry journal article supplement (doi:10.1039/c4dt01670j), 2014-08-06
Supplement: c4dt01670j1.pdf [file c4dt01670j1.pdf]

## Electronic Supporting Information

### Crystal Structure of $\text{Li}_2\text{B}_3\text{PO}_8$ with 2D-Linkage of $\text{BO}_3$ , $\text{BO}_4$ and $\text{PO}_4$ Groups

*Toru Hasegawa and Hisanori Yamane\**

Institute of Multidisciplinary Research for Advanced Materials, Tohoku University, 2-1-1 Katahira, Aoba-ku, Sendai 980-8577, Japan

\* Corresponding Author:

Hisanori Yamane

Institute of Multidisciplinary Research for Advanced Materials, Tohoku University

2-1-1 Katahira, Aoba-ku, Sendai 980-8577, Japan

E-mail: yamane@tagen.tohoku.ac.jp

### Contents

#### Structural information

Table S1. Crystal data and refinement results for  $\text{Li}_2\text{B}_3\text{PO}_8$ .

Table S2. Atomic coordinates and isotropic and equivalent isotropic displacement parameter ( $U_{\text{eq}}$ ) for  $\text{Li}_2\text{B}_3\text{PO}_8$ .

Table S3. Anisotropic displacement parameters ( $U_{ij}$  / Å) for  $\text{Li}_2\text{B}_3\text{PO}_8$ .

Table S4. Selected bond lengths and bond valence sums ( $V_i$ ) for  $\text{Li}_2\text{B}_3\text{PO}_8$ .

Table S5. Borophosphates reported in the literatures since 2007.

#### Electrical resistivity

Fig. S1 Complex impedance plots for a polycrystalline  $\text{Li}_2\text{B}_3\text{PO}_8$  sample at 583, 603, and 618 K.

Fig. S2 Arrhenius plots of the conductivities of  $\text{Li}_2\text{B}_3\text{PO}_8$  and  $\text{Li}_3\text{BP}_2\text{O}_8$  measured by the AC impedance method.

**Table S1. Crystal data and refinement results for Li<sub>2</sub>B<sub>3</sub>PO<sub>8</sub>.**

|                                           |                                                                                                                                                                                   |
|-------------------------------------------|-----------------------------------------------------------------------------------------------------------------------------------------------------------------------------------|
| Chemical formula                          | Li <sub>2</sub> B <sub>3</sub> PO <sub>8</sub>                                                                                                                                    |
| Formula weight, $M_r$                     | 205.28 g·mol <sup>-1</sup>                                                                                                                                                        |
| Temperature, $T$                          | 293(2) K                                                                                                                                                                          |
| Crystal system                            | Triclinic                                                                                                                                                                         |
| Space group                               | $P\bar{1}$ (No.2)                                                                                                                                                                 |
| Unit cell dimensions                      | $a = 8.6965(3) \text{ \AA}$ $\alpha = 90.8057(14)^\circ$<br>$b = 10.7354(5) \text{ \AA}$ $\beta = 90.6311(12)^\circ$<br>$c = 12.8282(5) \text{ \AA}$ $\gamma = 90.0940(13)^\circ$ |
| Unit cell volume, $V$                     | 1197.45(8) Å <sup>3</sup>                                                                                                                                                         |
| $Z$                                       | 8                                                                                                                                                                                 |
| Calculated density, $D_{\text{cal}}$      | 2.277 Mg·m <sup>-3</sup>                                                                                                                                                          |
| Radiation wavelength, $\lambda$           | 0.71075 Å (MoK $\alpha$ )                                                                                                                                                         |
| Crystal form, color                       | Colorless                                                                                                                                                                         |
| Absorption correction                     | Numerical                                                                                                                                                                         |
| Absorption coefficient, $\mu$             | 0.464 mm <sup>-1</sup>                                                                                                                                                            |
| Crystal size                              | 0.146×0.105×0.070 mm <sup>3</sup>                                                                                                                                                 |
| Limiting indices                          | $-11 \leq h \leq 10$<br>$-13 \leq k \leq 13$<br>$-16 \leq l \leq 16$                                                                                                              |
| $F_{000}$                                 | 800                                                                                                                                                                               |
| $\theta$ range for data collection        | 3.01°–27.49°                                                                                                                                                                      |
| Reflections collected / unique            | 5417 / 4094                                                                                                                                                                       |
| $R_{\text{int}}$                          | 0.0313                                                                                                                                                                            |
| Data / restraints / parameters            | 5417 / 0 / 505                                                                                                                                                                    |
| Weight parameters, $a, b$                 | 0.0256, 3.1989                                                                                                                                                                    |
| Goodness-of-fit on $F^2$ , $S$            | 1.100                                                                                                                                                                             |
| $R1, wR2$ ( $I > 2\sigma(I)$ )            | 0.0396, 0.0891                                                                                                                                                                    |
| $R1, wR2$ (all data)                      | 0.0599, 0.1033                                                                                                                                                                    |
| Largest diff. peak and hole, $\Delta\rho$ | 0.491, -0.516 e·Å <sup>-3</sup>                                                                                                                                                   |

$R1 = \Sigma||F_o| - |F_c|| / \Sigma|F_o|$ .     $wR2 = [\Sigma w(F_o^2 - F_c^2)^2 / \Sigma(wF_o^2)^2]^{1/2}$ ,  $w = 1 / [\sigma^2(F_o^2) + (aP)^2 + bP]$ , where  $F_o$  is the observed structure factor,  $F_c$  is the calculated structure factor,  $\sigma$  is the standard deviation of  $F_c^2$ , and  $P = (F_o^2 + 2F_c^2) / 3$ .     $S = [\Sigma w(F_o^2 - F_c^2)^2 / (n - p)]^{1/2}$ , where  $n$  is the number of reflections and  $p$  is the total number of parameters refined.

**Table S2. Atomic coordinates and isotropic and equivalent isotropic displacement parameter ( $U_{eq}$ ) for  $\text{Li}_2\text{B}_3\text{PO}_8$ .**

| Atom | Site | $x$        | $y$         | $z$         | $U_{eq}^* / \text{\AA}^2$ |
|------|------|------------|-------------|-------------|---------------------------|
| Li1  | 2i   | 0.1194(7)  | 0.3435(6)   | 0.7149(5)   | 0.0269(13)                |
| Li2  | 2i   | 0.1349(7)  | 0.7728(5)   | 0.2632(5)   | 0.0229(12)                |
| Li3  | 2i   | 0.2177(7)  | 0.2781(5)   | 0.0384(5)   | 0.0248(13)                |
| Li4  | 2i   | 0.2550(7)  | 0.5441(5)   | 0.3297(5)   | 0.0256(13)                |
| Li5  | 2i   | 0.2578(7)  | 0.0611(5)   | 0.8284(5)   | 0.0253(13)                |
| Li6  | 2i   | 0.3636(6)  | 0.5413(5)   | 0.0092(4)   | 0.0191(11)                |
| Li7  | 2i   | 0.4378(9)  | 0.0430(6)   | 0.4145(6)   | 0.0411(18)                |
| Li8  | 2i   | 0.7620(7)  | 0.1693(5)   | 0.3954(5)   | 0.0267(13)                |
| B1   | 2i   | 0.2584(5)  | 0.9615(4)   | 0.2316(4)   | 0.0108(6)                 |
| B2   | 2i   | 0.1188(4)  | 0.1104(3)   | 0.4252(3)   | 0.0129(7)                 |
| B3   | 2i   | 0.1895(4)  | 0.0114(3)   | 0.1454(3)   | 0.0132(7)                 |
| B4   | 2i   | 0.1998(4)  | 0.5544(3)   | 0.6125(3)   | 0.0142(7)                 |
| B5   | 2i   | 0.3018(4)  | 0.2599(3)   | 0.3506(3)   | 0.0134(7)                 |
| B6   | 2i   | 0.3936(4)  | 0.3953(3)   | 0.6465(3)   | 0.0131(7)                 |
| B7   | 2i   | 0.4455(4)  | 0.0863(3)   | 0.1207(3)   | 0.0126(7)                 |
| B8   | 2i   | 0.5442(4)  | 0.3815(3)   | 0.3393(3)   | 0.0138(7)                 |
| B9   | 2i   | 0.5910(4)  | 0.1150(3)   | 0.7927(3)   | 0.0135(7)                 |
| B10  | 2i   | 0.6894(4)  | 0.1961(3)   | 0.0760(3)   | 0.0137(7)                 |
| B11  | 2i   | 0.9067(4)  | 0.3404(3)   | 0.0575(3)   | 0.0138(7)                 |
| B12  | 2i   | 0.9459(4)  | 0.1200(3)   | 0.1009(3)   | 0.0142(7)                 |
| P1   | 2i   | 0.07737(9) | 0.52997(7)  | 0.12829(6)  | 0.01285(17)               |
| P2   | 2i   | 0.09892(9) | 0.06616(7)  | 0.63710(6)  | 0.01323(17)               |
| P3   | 2i   | 0.59107(9) | 0.20738(7)  | 0.59192(6)  | 0.01129(16)               |
| P4   | 2i   | 0.59190(9) | 0.69182(7)  | 0.14312(6)  | 0.01225(17)               |
| O1   | 2i   | 0.0035(2)  | 0.20989(19) | 0.41305(18) | 0.0173(5)                 |
| O2   | 2i   | 0.0035(2)  | 0.2347(2)   | 0.09068(18) | 0.0172(5)                 |
| O3   | 2i   | 0.0345(2)  | 0.0188(2)   | 0.12575(18) | 0.0171(5)                 |
| O4   | 2i   | 0.0416(2)  | 0.6339(2)   | 0.04828(17) | 0.0171(5)                 |
| O5   | 2i   | 0.0474(2)  | 0.5746(2)   | 0.59950(19) | 0.0196(5)                 |
| O6   | 2i   | 0.0622(2)  | 0.9913(2)   | 0.38834(18) | 0.0173(5)                 |
| O7   | 2i   | 0.0688(3)  | 0.1807(2)   | 0.70236(19) | 0.0229(5)                 |
| O8   | 2i   | 0.0690(2)  | 0.5546(2)   | 0.87040(17) | 0.0166(5)                 |
| O9   | 2i   | 0.0853(2)  | 0.5941(2)   | 0.23411(17) | 0.0170(5)                 |
| O10  | 2i   | 0.1744(3)  | 0.1019(2)   | 0.53217(18) | 0.0214(5)                 |
| O11  | 2i   | 0.1994(2)  | 0.35617(19) | 0.36482(18) | 0.0167(5)                 |

|     |    |           |             |             |           |
|-----|----|-----------|-------------|-------------|-----------|
| O12 | 2i | 0.2173(2) | 0.4567(2)   | 0.09794(18) | 0.0173(5) |
| O13 | 2i | 0.2449(2) | 0.90717(19) | 0.18980(17) | 0.0141(4) |
| O14 | 2i | 0.2486(2) | 0.43693(19) | 0.59977(17) | 0.0149(4) |
| O15 | 2i | 0.2600(2) | 0.14049(19) | 0.36507(17) | 0.0145(4) |
| O16 | 2i | 0.2673(2) | 0.7189(2)   | 0.38041(17) | 0.0168(5) |
| O17 | 2i | 0.2883(2) | 0.2233(2)   | 0.90071(17) | 0.0177(5) |
| O18 | 2i | 0.2885(2) | 0.10564(19) | 0.11519(17) | 0.0162(5) |
| O19 | 2i | 0.3444(2) | 0.3478(2)   | 0.74722(17) | 0.0185(5) |
| O20 | 2i | 0.4371(2) | 0.76109(19) | 0.16470(17) | 0.0154(5) |
| O21 | 2i | 0.4502(2) | 0.28156(19) | 0.32196(18) | 0.0162(5) |
| O22 | 2i | 0.4518(2) | 0.29727(19) | 0.57872(17) | 0.0159(5) |
| O23 | 2i | 0.4941(2) | 0.50111(19) | 0.34115(17) | 0.0156(5) |
| O24 | 2i | 0.4954(2) | 0.0189(2)   | 0.83939(17) | 0.0157(5) |
| O25 | 2i | 0.5336(2) | 0.1806(2)   | 0.08336(18) | 0.0173(5) |
| O26 | 2i | 0.5529(2) | 0.11031(19) | 0.67929(17) | 0.0153(5) |
| O27 | 2i | 0.5538(3) | 0.5799(2)   | 0.07765(18) | 0.0204(5) |
| O28 | 2i | 0.5978(2) | 0.1265(2)   | 0.49453(17) | 0.0160(5) |
| O29 | 2i | 0.6991(2) | 0.35095(19) | 0.35728(18) | 0.0173(5) |
| O30 | 2i | 0.7430(2) | 0.31136(19) | 0.05801(18) | 0.0166(5) |
| O31 | 2i | 0.7890(2) | 0.09640(19) | 0.08840(18) | 0.0157(5) |
| O32 | 2i | 0.7960(3) | 0.0252(2)   | 0.30972(18) | 0.0190(5) |

---

\*  $U_{eq} = (\sum_i \sum_j U_{ij} a_i^* a_j^* \mathbf{a}_i \cdot \mathbf{a}_j) / 3$

**Table S3.** Anisotropic displacement parameters ( $U_{ij} / \text{\AA}$ ) for  $\text{Li}_2\text{B}_3\text{PO}_8$ .

| Atom | Site | $U_{11}$   | $U_{22}$   | $U_{33}$   | $U_{23}$    | $U_{13}$    | $U_{12}$    |
|------|------|------------|------------|------------|-------------|-------------|-------------|
| Li1  | 2i   | 0.019(3)   | 0.022(3)   | 0.040(4)   | -0.005(3)   | 0.007(3)    | -0.006(2)   |
| Li2  | 2i   | 0.019(3)   | 0.018(3)   | 0.031(3)   | -0.001(2)   | -0.001(2)   | -0.004(2)   |
| Li3  | 2i   | 0.023(3)   | 0.023(3)   | 0.029(3)   | -0.002(2)   | 0.011(2)    | -0.003(2)   |
| Li4  | 2i   | 0.025(3)   | 0.015(3)   | 0.036(4)   | 0.001(2)    | -0.008(3)   | 0.002(2)    |
| Li5  | 2i   | 0.030(3)   | 0.019(3)   | 0.026(3)   | 0.001(2)    | -0.005(2)   | -0.007(2)   |
| Li6  | 2i   | 0.010(2)   | 0.021(3)   | 0.026(3)   | -0.003(2)   | 0.001(2)    | 0.000(2)    |
| Li7  | 2i   | 0.046(4)   | 0.026(3)   | 0.050(4)   | -0.009(3)   | -0.031(4)   | 0.009(3)    |
| Li8  | 2i   | 0.029(3)   | 0.018(3)   | 0.034(3)   | 0.000(2)    | 0.009(3)    | 0.002(2)    |
| B1   | 2i   | 0.0145(17) | 0.0151(17) | 0.0178(18) | -0.0011(14) | -0.0011(13) | 0.0006(14)  |
| B2   | 2i   | 0.0105(16) | 0.0108(15) | 0.0175(17) | -0.0004(13) | 0.0045(13)  | -0.0014(13) |
| B3   | 2i   | 0.0122(16) | 0.0115(15) | 0.0158(17) | -0.0001(13) | 0.0037(13)  | -0.0030(13) |
| B4   | 2i   | 0.0116(16) | 0.0152(17) | 0.0160(17) | 0.0023(13)  | 0.0013(13)  | -0.0038(13) |
| B5   | 2i   | 0.0117(16) | 0.0133(16) | 0.0151(17) | 0.0004(13)  | -0.0011(13) | 0.0020(13)  |
| B6   | 2i   | 0.0128(16) | 0.0092(15) | 0.0173(17) | -0.0001(13) | -0.0009(13) | -0.0003(13) |
| B7   | 2i   | 0.0121(16) | 0.0125(16) | 0.0130(17) | -0.0014(13) | 0.0005(13)  | -0.0019(13) |
| B8   | 2i   | 0.0116(16) | 0.0145(16) | 0.0155(17) | 0.0015(13)  | 0.0011(13)  | 0.0011(13)  |
| B9   | 2i   | 0.0116(16) | 0.0118(16) | 0.0173(18) | 0.0012(13)  | 0.0022(13)  | -0.0008(13) |
| B10  | 2i   | 0.0157(17) | 0.0136(16) | 0.0118(17) | 0.0032(13)  | -0.0020(13) | -0.0019(13) |
| B11  | 2i   | 0.0108(16) | 0.0080(15) | 0.0226(19) | 0.0031(13)  | -0.0010(13) | -0.0039(12) |
| B12  | 2i   | 0.0158(17) | 0.0141(16) | 0.0127(17) | 0.0018(13)  | -0.0006(13) | -0.0011(13) |
| P1   | 2i   | 0.0124(4)  | 0.0108(4)  | 0.0153(4)  | -0.0014(3)  | 0.0002(3)   | -0.0011(3)  |
| P2   | 2i   | 0.0120(4)  | 0.0113(4)  | 0.0163(4)  | -0.0015(3)  | 0.0004(3)   | -0.0020(3)  |
| P3   | 2i   | 0.0112(4)  | 0.0085(3)  | 0.0142(4)  | -0.0006(3)  | 0.0000(3)   | 0.0003(3)   |
| P4   | 2i   | 0.0117(4)  | 0.0111(4)  | 0.0139(4)  | -0.0014(3)  | 0.0005(3)   | 0.0002(3)   |
| O1   | 2i   | 0.0132(11) | 0.0107(10) | 0.0281(13) | 0.0015(9)   | 0.0033(9)   | -0.0005(8)  |
| O2   | 2i   | 0.0101(10) | 0.0123(10) | 0.0292(13) | 0.0042(9)   | -0.0025(9)  | 0.0007(8)   |
| O3   | 2i   | 0.0085(10) | 0.0143(11) | 0.0285(13) | 0.0055(9)   | -0.0019(9)  | 0.0006(8)   |
| O4   | 2i   | 0.0168(11) | 0.0151(11) | 0.0196(12) | 0.0010(9)   | 0.0046(9)   | 0.0006(9)   |
| O5   | 2i   | 0.0124(11) | 0.0111(10) | 0.0354(14) | 0.0002(10)  | -0.0029(10) | 0.0022(9)   |
| O6   | 2i   | 0.0121(11) | 0.0114(10) | 0.0283(13) | -0.0019(9)  | -0.0018(9)  | -0.0015(8)  |
| O7   | 2i   | 0.0199(12) | 0.0177(12) | 0.0308(14) | -0.0091(10) | 0.0039(10)  | -0.0043(9)  |
| O8   | 2i   | 0.0132(11) | 0.0138(11) | 0.0230(12) | -0.0020(9)  | 0.0038(9)   | -0.0025(9)  |
| O9   | 2i   | 0.0180(11) | 0.0157(11) | 0.0172(11) | -0.0016(9)  | 0.0012(9)   | -0.0024(9)  |
| O10  | 2i   | 0.0161(12) | 0.0280(13) | 0.0200(12) | 0.0032(10)  | -0.0021(9)  | -0.0062(10) |
| O11  | 2i   | 0.0114(10) | 0.0111(10) | 0.0278(13) | 0.0016(9)   | 0.0017(9)   | -0.0004(8)  |
| O12  | 2i   | 0.0136(11) | 0.0146(11) | 0.0237(12) | -0.0016(9)  | 0.0032(9)   | -0.0004(9)  |

|     |      |            |            |            |             |            |            |
|-----|------|------------|------------|------------|-------------|------------|------------|
| O13 | $2i$ | 0.0114(10) | 0.0097(10) | 0.0214(12) | 0.0037(8)   | 0.0014(8)  | 0.0000(8)  |
| O14 | $2i$ | 0.0134(11) | 0.0113(10) | 0.0200(12) | -0.0002(9)  | -0.0032(9) | 0.0006(8)  |
| O15 | $2i$ | 0.0109(10) | 0.0097(10) | 0.0230(12) | 0.0006(9)   | 0.0052(9)  | -0.0014(8) |
| O16 | $2i$ | 0.0141(11) | 0.0142(11) | 0.0221(12) | -0.0011(9)  | -0.0003(9) | -0.0022(9) |
| O17 | $2i$ | 0.0164(11) | 0.0161(11) | 0.0206(12) | 0.0000(9)   | 0.0042(9)  | -0.0022(9) |
| O18 | $2i$ | 0.0121(11) | 0.0127(10) | 0.0239(12) | 0.0063(9)   | 0.0005(9)  | 0.0009(8)  |
| O19 | $2i$ | 0.0154(11) | 0.0220(12) | 0.0181(12) | 0.0031(9)   | -0.0004(9) | -0.0012(9) |
| O20 | $2i$ | 0.0118(10) | 0.0129(10) | 0.0213(12) | -0.0018(9)  | 0.0022(9)  | -0.0003(8) |
| O21 | $2i$ | 0.0121(10) | 0.0115(10) | 0.0252(12) | -0.0014(9)  | 0.0048(9)  | -0.0014(8) |
| O22 | $2i$ | 0.0154(11) | 0.0125(10) | 0.0197(12) | -0.0019(9)  | -0.0024(9) | 0.0036(9)  |
| O23 | $2i$ | 0.0108(10) | 0.0104(10) | 0.0256(12) | 0.0000(9)   | -0.0013(9) | 0.0012(8)  |
| O24 | $2i$ | 0.0103(10) | 0.0156(11) | 0.0214(12) | 0.0038(9)   | 0.0012(8)  | -0.0011(8) |
| O25 | $2i$ | 0.0108(10) | 0.0154(11) | 0.0258(12) | 0.0065(9)   | 0.0005(9)  | 0.0001(9)  |
| O26 | $2i$ | 0.0193(11) | 0.0107(10) | 0.0159(11) | 0.0006(8)   | -0.0022(9) | -0.0005(9) |
| O27 | $2i$ | 0.0181(12) | 0.0172(11) | 0.0256(13) | -0.0097(10) | -0.0019(9) | 0.0010(9)  |
| O28 | $2i$ | 0.0167(11) | 0.0146(11) | 0.0166(11) | -0.0034(9)  | 0.0010(9)  | -0.0004(9) |
| O29 | $2i$ | 0.0107(10) | 0.0100(10) | 0.0314(13) | 0.0010(9)   | 0.0016(9)  | 0.0005(8)  |
| O30 | $2i$ | 0.0135(11) | 0.0109(10) | 0.0255(12) | 0.0032(9)   | -0.0014(9) | -0.0004(8) |
| O31 | $2i$ | 0.0081(10) | 0.0124(10) | 0.0269(12) | 0.0046(9)   | 0.0006(9)  | 0.0012(8)  |
| O32 | $2i$ | 0.0188(12) | 0.0180(11) | 0.0202(12) | 0.0010(9)   | -0.0033(9) | -0.0008(9) |

---

**Table S4. Selected bond lengths and bond valence sums ( $V_i$ ) for  $\text{Li}_2\text{B}_3\text{PO}_8$ .**

|                        |          |                       |          |
|------------------------|----------|-----------------------|----------|
| Li1–O7                 | 1.806(6) | Li2–O7 <sup>i</sup>   | 1.896(6) |
| Li1–O19                | 1.995(6) | Li2–O16               | 1.978(6) |
| Li1–O9 <sup>i</sup>    | 2.016(6) | Li2–O13               | 1.984(6) |
| Li1–O14                | 2.127(7) | Li2–O9                | 1.995(6) |
| $V_{\text{Li1}}$       | 1.03     | $V_{\text{Li2}}$      | 1.05     |
| Li3–O17 <sup>ii</sup>  | 1.959(6) | Li4–O16               | 1.980(6) |
| Li3–O2                 | 2.042(6) | Li4–O9                | 1.987(6) |
| Li3–O12                | 2.054(6) | Li4–O11               | 2.129(6) |
| Li3–O18                | 2.195(6) | Li4–O23               | 2.135(6) |
| $V_{\text{Li3}}$       | 0.82     | $V_{\text{Li4}}$      | 0.82     |
| Li5–O17                | 1.978(6) | Li6–O27 <sup>iv</sup> | 1.852(6) |
| Li5–O32 <sup>iii</sup> | 2.037(6) | Li6–O27               | 1.906(6) |
| Li5–O31 <sup>iii</sup> | 2.055(6) | Li6–O12               | 1.949(6) |
| Li5–O24                | 2.119(7) | Li6–O30 <sup>iv</sup> | 2.032(6) |
| $V_{\text{Li5}}$       | 0.84     | $V_{\text{Li6}}$      | 1.14     |
| Li7–O28                | 1.933(7) | Li8–O32               | 1.910(6) |
| Li7–O15                | 1.972(7) | Li8–O28               | 1.980(6) |
| Li7–O26 <sup>iii</sup> | 2.027(7) | Li8–O29               | 2.089(6) |
| Li7–O28 <sup>iii</sup> | 2.200(8) | Li8–O1 <sup>v</sup>   | 2.154(7) |
| $V_{\text{Li7}}$       | 0.89     | $V_{\text{Li8}}$      | 0.89     |
| B1–O1                  | 1.346(4) | B2–O6 <sup>vi</sup>   | 1.440(4) |
| B1–O5 <sup>i</sup>     | 1.347(4) | B2–O10                | 1.454(4) |
| B1–O11                 | 1.403(4) | B2–O1                 | 1.475(4) |
| $V_{\text{B1}}$        | 3.05     | B2–O15                | 1.495(4) |
|                        |          | $V_{\text{B2}}$       | 3.10     |
| B3–O13 <sup>vi</sup>   | 1.350(4) | B4–O14                | 1.339(4) |
| B3–O3                  | 1.371(4) | B4–O5                 | 1.352(4) |
| B3–O18                 | 1.389(4) | B4–O29 <sup>vii</sup> | 1.391(4) |
| $V_{\text{B3}}$        | 3.01     | $V_{\text{B4}}$       | 3.09     |

|                       |          |                       |          |
|-----------------------|----------|-----------------------|----------|
| B5–O15                | 1.347(4) | B6–O22                | 1.452(4) |
| B5–O21                | 1.366(4) | B6–O14                | 1.464(4) |
| B5–O11                | 1.377(4) | B6–O19                | 1.464(4) |
| $V_{B5}$              | 3.06     | B6–O23 <sup>vii</sup> | 1.484(4) |
|                       |          | $V_{B6}$              | 3.10     |
| B7–O24 <sup>iii</sup> | 1.348(4) | B8–O23                | 1.357(4) |
| B7–O25                | 1.364(4) | B8–O21                | 1.362(4) |
| B7–O18                | 1.382(4) | B8–O29                | 1.404(4) |
| $V_{B7}$              | 3.06     | $V_{B8}$              | 2.98     |
| B9–O20 <sup>vii</sup> | 1.453(4) | B10–O30               | 1.346(4) |
| B9–O24                | 1.463(4) | B10–O25               | 1.369(4) |
| B9–O13 <sup>vi</sup>  | 1.463(4) | B10–O31               | 1.387(4) |
| B9–O26                | 1.488(4) | $V_{B10}$             | 3.03     |
| $V_{B9}$              | 3.09     |                       |          |
| B11–O30               | 1.457(4) | B12–O2 <sup>v</sup>   | 1.338(4) |
| B11–O8 <sup>vii</sup> | 1.461(4) | B12–O3 <sup>v</sup>   | 1.372(4) |
| B11–O4 <sup>iv</sup>  | 1.463(4) | B12–O31               | 1.394(4) |
| B11–O2 <sup>v</sup>   | 1.479(4) | $V_{B12}$             | 3.03     |
| $V_{B11}$             | 3.10     |                       |          |
| P1–O12                | 1.502(2) | P2–O7                 | 1.503(2) |
| P1–O9                 | 1.514(2) | P2–O32 <sup>iii</sup> | 1.506(2) |
| P1–O4                 | 1.556(2) | P2–O10                | 1.557(2) |
| P1–O8 <sup>i</sup>    | 1.563(2) | P2–O6 <sup>i</sup>    | 1.560(2) |
| $V_{P1}$              | 5.02     | $V_{P2}$              | 5.05     |
| P3–O16 <sup>vii</sup> | 1.499(2) | P4–O27                | 1.491(2) |
| P3–O28                | 1.513(2) | P4–O17 <sup>vii</sup> | 1.502(2) |
| P3–O22                | 1.559(2) | P4–O20                | 1.565(2) |
| P3–O26                | 1.579(2) | P4–O19 <sup>vii</sup> | 1.571(2) |
| $V_{P3}$              | 4.98     | $V_{P4}$              | 5.05     |

---

Symmetry codes: (i)  $-x, -y+1, -z+1$ ; (ii)  $x, y, z-1$ ; (iii)  $-x+1, -y, -z+1$ ; (iv)  $-x+1, -y+1, -z$ ; (v)  $x+1, y, z$ ; (vi)  $x, y-1, z$ ; (vii)  $-x+1, -y+1, -z+1$ .

Bond valence parameters:  $\text{Li}^+$ : 1.466 Å,  $\text{B}^{3+}$ : 1.371 Å,  $\text{P}^{5+}$ : 1.617 Å.



**Table S5. Borophosphates reported in the literatures since 2007.**

| compounds                                                                                                                                           | B:P | M/T |                                              |
|-----------------------------------------------------------------------------------------------------------------------------------------------------|-----|-----|----------------------------------------------|
| $(\text{NH}_4)[\text{B}_3\text{PO}_6(\text{OH})_3] \cdot 0.5\text{H}_2\text{O}$                                                                     | 3:1 | M   | Acta Cryst. E 63, i185 (2007)                |
| $\text{Na}_3\text{B}_6\text{PO}_{13}$                                                                                                               | 1:2 | M   | J. Solid State Chem., 180, 233-239 (2007)    |
| $\text{Na}_3\text{BP}_2\text{O}_8$                                                                                                                  | 1:2 | T   | J. Solid State Chem., 180, 233-239 (2007)    |
| $(\text{C}_4\text{H}_{12}\text{N}_2)_3(\text{Fe}_6(\text{H}_2\text{O})_4)(\text{B}_6\text{P}_{12}\text{O}_{50}(\text{OH})_2)(\text{H}_2\text{O})_2$ | 1:2 | T   | Sci. Technol. Adv. Mat., 8, 399-405 (2007)   |
| $\text{Ca}_{0.5}(\text{Ni}(\text{H}_2\text{O})_2)(\text{BP}_2\text{O}_8)(\text{H}_2\text{O})$                                                       | 1:2 | T   | Z. Krist.-New Cyst. St., 222, 1-2 (2007)     |
| $\text{CsSc}(\text{B}_2\text{P}_3\text{O}_{11}(\text{OH})_3)$                                                                                       | 2:3 | M   | Inorg. Chem., 46, 7503-7508 (2007)           |
| $(\text{NH}_4)(\text{B}_3\text{PO}_6(\text{OH})_3)(\text{H}_2\text{O})_{0.5}$                                                                       | 3:1 | M   | Acta Cryst. E., 63, i185 (2007)              |
| $\text{Zn}[\text{BPO}_4(\text{OH})_2]$                                                                                                              | 1:1 | T   | Chem.-Eur. J., 14, 1757-1761 (2008)          |
| $\text{Na}_8[\text{Cr}_4\text{B}_{12}\text{P}_8\text{O}_{44}(\text{OH})_4][\text{P}_2\text{O}_7] (\text{H}_2\text{O})_n$                            | 6:5 | M   | Chem.-Eur. J., 14, 7212-7217 (2008)          |
| $\text{Ca}_{0.5}\text{Fe}(\text{H}_2\text{O})_2[\text{BP}_2\text{O}_8] \cdot \text{H}_2\text{O}$                                                    | 1:2 | T   | Z. Krist.-New Cyst. St., 223, 9-10 (2008)    |
| $\text{KV}[\text{BP}_2\text{O}_8(\text{OH})]$                                                                                                       | 1:2 | T   | Z. Krist.-New Cyst. St., 223, 323-324 (2008) |
| $\text{LiCo}(\text{H}_2\text{O})_2[\text{BP}_2\text{O}_8] \cdot \text{H}_2\text{O}$                                                                 | 1:2 | T   | Z. Krist.-New Cyst. St., 223, 333-334 (2008) |
| $\text{CaFe}[\text{BP}_2\text{O}_8(\text{OH})_3]$                                                                                                   | 1:2 | T   | Z. Krist.-New Cyst. St., 223, 335-336 (2008) |
| $\text{BaFe}(\text{BP}_2\text{O}_8(\text{OH}))$                                                                                                     | 1:2 | T   | Z. Krist.-New Cyst. St., 223, 337-338 (2008) |
| $\text{BaCo}[\text{BP}_2\text{O}_8(\text{OH})]$                                                                                                     | 1:2 | T   | Z. Krist.-New Cyst. St., 223, 339-340 (2008) |
| $M\text{BPO}_4(\text{OH})_2$ $M=\text{Mg, Ni}$                                                                                                      | 1:1 | T   | J. Solid State Chem., 181, 1110-1115 (2008)  |
| $\text{LiMg}(\text{H}_2\text{O})_2[\text{BP}_2\text{O}_8] \cdot \text{H}_2\text{O}$                                                                 | 1:2 | T   | Acta Cryst. E, 64, I39-U126 (2008)           |
| $\text{Na}_3\text{Pb}(\text{II})[\text{B}(\text{O}_3\text{POH})_4]$                                                                                 | 1:1 | T   | Inorg. Chem., 47, 10193-10195 (2008)         |
| $\text{Na}_5(\text{NH}_4)\text{Mn}_3[\text{B}_9\text{P}_6\text{O}_{33}(\text{OH})_3] (\text{H}_2\text{O})_{1.5}$                                    | 3:2 | M   | Acta Cryst. E, 64, I82-U28 (2008)            |
| $\text{Na}_2(\text{VB}_3\text{P}_2\text{O}_{12}(\text{OH}))(\text{H}_2\text{O})_{2.92}$                                                             | 3:2 | M   | Chem. Mater., 20, 4900-4905 (2008)           |
| $(\text{CH}_3\text{NH}_3)_4[\text{N}(\text{CH}_3)_4](\text{CoPO}_4)_4[\text{B}_5\text{O}_6(\text{OH})_4]$                                           | 5:4 | M   | Dalton Trans., 5287-5289 (2009)              |
| $(\text{C}_4\text{N}_3\text{H}_{16})(\text{C}_4\text{N}_3\text{H}_{15})_{0.5}[\text{Fe}_2\text{B}_4\text{P}_7\text{O}_{26}(\text{OH})_4]$           | 4:7 | T   | J. Mater. Chem., 19, 4523-4528 (2009)        |
| $\text{CaCo}(\text{H}_2\text{O})[\text{BP}_2\text{O}_8(\text{OH})] \cdot \text{H}_2\text{O}$                                                        | 1:2 | T   | Z. Anorg. Allg. Chem., 635, 614-617 (2009)   |
| $\text{SrFe}[\text{BP}_2\text{O}_8(\text{OH})_2]$                                                                                                   | 1:2 | T   | Z. Anorg. Allg. Chem., 635, 1153-1156 (2009) |
| $\text{Cs}_2\text{Co}_3(\text{H}_2\text{O})_2[\text{B}_4\text{P}_6\text{O}_{24}(\text{OH})_2]$                                                      | 2:3 | T   | Z. Krist.-New Cyst. St., 224, 1-2 (2009)     |
| $(\text{Co}_{0.6}\text{Mn}_{0.4})_2(\text{H}_2\text{O})[\text{BP}_3\text{O}_9(\text{OH})_4]$                                                        | 1:3 | T   | Z. Krist.-New Cyst. St., 224, 371-372 (2009) |
| $\text{LiCu}_2\text{BP}_2\text{O}_8(\text{OH})_2$                                                                                                   | 1:2 | T   | Acta Cryst. E, 65, i40 (2009)                |
| $\text{LiNi}(\text{H}_2\text{O})_2[\text{BP}_2\text{O}_8] \cdot \text{H}_2\text{O}$                                                                 | 1:2 | T   | Acta Cryst. E, 65, i42 (2009)                |
| $\text{KM}\text{BP}_2\text{O}_8$ ( $M = \text{Sr, Ba}$ )                                                                                            | 1:2 | T   | Inorg. Chem., 48, 6623-6629 (2009)           |
| $\text{KNi}_5[\text{P}_6\text{B}_6\text{O}_{23}(\text{OH})_{13}]$                                                                                   | 1:1 | T   | Acta Cryst. C, 65, i94-i98 (2009)            |

|                                                                                                                                            |         |     |                                                                                                   |
|--------------------------------------------------------------------------------------------------------------------------------------------|---------|-----|---------------------------------------------------------------------------------------------------|
| $\text{Na}(\text{H}_2\text{O})\text{Mn}(\text{H}_2\text{O})_2(\text{BP}_2\text{O}_8)$                                                      | 1:2     | T   | <i>Crystallogr. Rrep.</i> , 54(1), 13-18 (2009)                                                   |
| $(\text{NH}_4)_4[\text{H}_2\text{B}_2\text{P}_4\text{O}_{16}]$                                                                             | 1:2     | T   | <i>Dalton Trans.</i> , 39, 1713-1715 (2010)                                                       |
| $[\text{Na}_{11}\text{K}_5\text{Cr}_8\text{B}_4\text{P}_{12}\text{O}_{70}\text{H}_8]^{15-}$                                                | 1:3     | T   | <i>Dalton Trans.</i> , 39, 7262-7265 (2010)                                                       |
| $(\text{NH}_4)_7\text{Co}_4(\text{H}_2\text{O})[\text{B}_2\text{P}_4\text{O}_{15}(\text{OH})_2]_2[\text{H}_2\text{PO}_4][\text{HPO}_4]$    | 2:5     | T   | <i>Dalton Trans.</i> , 39, 10571-10573 (2010)                                                     |
| $\text{NaSc}[\text{BP}_2\text{O}_6(\text{OH})_3][(\text{HO})\text{PO}_3]$                                                                  | 1:3     | T   | <i>Z. Anorg. Allg. Chem.</i> , 636, 19-22 (2010)                                                  |
| $\text{Pb}_4\{\text{Co}_2[\text{B}(\text{OH})_2\text{P}_2\text{O}_8](\text{PO}_4)_2\}\text{Cl}$                                            | 1:4     | T   | <i>Z. Anorg. Allg. Chem.</i> , 636, 1454-1460 (2010)                                              |
| $\text{Li}_3\text{V}_2[\text{BP}_3\text{O}_{12}(\text{OH})][\text{HPO}_4]$                                                                 | 1:4     | T   | <i>Z. Krist.-New Cyst. St.</i> , 225, 3-4 (2010)                                                  |
| $(\text{Ga}_{0.71}\text{B}_{0.29})\text{PO}_4$                                                                                             | 0.29:1  | T   | <i>Acta Cryst. E</i> , 66, i4 (2010)                                                              |
| $\text{Sr}_{10}\text{P}_{5.50}\text{B}_{1.50}\text{O}_{26}$                                                                                | 1.5:5.5 | T,L | <i>J. Solid State Chem.</i> , 183, 658-661 (2010)                                                 |
| $M_2\text{B}(\text{PO}_4)_3$ $M=\text{Fe, In}$                                                                                             | 1:3     | M   | <i>Acta Cryst. E.</i> , 66, i63-i63 (2010)<br><i>J. Solid State Chem.</i> , 183, 1108-1113 (2010) |
| $\text{Fe}_2[\text{BP}_3\text{O}_{12}]$                                                                                                    | 1:3     | M   | <i>Acta Cryst. E</i> , 66, I63-U103 (2010)                                                        |
| $\text{K}(\text{Fe,Al})[\text{BP}_2\text{O}_8(\text{OH})]$ ,                                                                               | 1:2     | T   | <i>Crystallogr. Rrep.</i> , 55, 760-768 (2010)                                                    |
| $\text{Rb}(\text{Al,Fe})[\text{BP}_2\text{O}_8(\text{OH})]$                                                                                | 1:2     | T   |                                                                                                   |
| $M(\text{II})(\text{H}_2\text{O})_2[\text{B}_2\text{P}_2\text{O}_8(\text{OH})_2]\text{H}_2\text{O}$ ( $M(\text{II}) = \text{Fe, Co, Ni}$ ) | 1:1     | T   | <i>Inorg. Chim. Acta</i> , 363, 4299-4306 (2010)                                                  |
| $\text{Cs}_2\text{Cr}_3(\text{BP}_4\text{O}_{14})(\text{P}_4\text{O}_{13})$                                                                | 1:8     | T   | <i>Inorg. Chem.</i> , 49, 2550-2556 (2010)                                                        |
| $\text{CsFe}(\text{BP}_3\text{O}_{11})$                                                                                                    | 1:3     | T   | <i>Inorg. Chem.</i> , 49, 2550-2556 (2010)                                                        |
| $\text{Zn}_3(\text{BO}_3)(\text{PO}_4)$                                                                                                    | 1:1     | M   | <i>Acta Cryst. E</i> , 67, i3 (2011)                                                              |
| $(\text{NH}_4)_6[\text{Mn}_3\text{B}_6\text{P}_9\text{O}_{36}(\text{OH})_3]\cdot 4\text{H}_2\text{O}$                                      | 2:3     | T   | <i>Dalton T.</i> , 40, 2549-2554 (2011)                                                           |
| $\text{Ti}[\text{BP}_2\text{O}_7(\text{OH})_3]$                                                                                            | 1:2     | T   | <i>Crystengcomm</i> , 13, 7185-7188 (2011)                                                        |
| $\text{Na}_6\text{H}_2\text{Co}_3\text{B}_2\text{P}_5\text{O}_{22}\text{Cl}$                                                               | 2:5     | T   | <i>Inorg. Chem.</i> , 50, 1073-1078 (2011)                                                        |
| $\text{K}_5\text{H}_2\text{Mn}_2\text{B}_2\text{P}_5\text{O}_{21}$                                                                         | 2:5     | T   | <i>Inorg. Chem.</i> , 50, 1073-1078 (2011)                                                        |
| $\text{N}_8\text{H}_{36}\text{Co}_2\text{B}_4\text{P}_8\text{O}_{34}$                                                                      | 1:2     | T   | <i>Inorg. Chem.</i> , 50, 1073-1078 (2011)                                                        |
| $\text{C}_3\text{H}_{13}\text{N}_2\text{MnB}_2\text{P}_3\text{O}_{13}$                                                                     | 2:3     | T   | <i>Solid State Sci.</i> , 13, 757-761 (2011)                                                      |
| $\text{C}_3\text{H}_{13}\text{N}_2\text{FeB}_2\text{P}_3\text{O}_{13}$                                                                     | 2:3     | T   | <i>Solid State Sci.</i> , 13, 757-761 (2011)                                                      |
| $\text{C}_4\text{H}_{13}\text{N}_2\text{FeB}_2\text{P}_3\text{O}_{13}$                                                                     | 2:3     | T   | <i>Solid State Sci.</i> , 13, 757-761 (2011)                                                      |
| $\text{AgMg}(\text{H}_2\text{O})_2[\text{BP}_2\text{O}_8]\text{H}_2\text{O}$                                                               | 1:2     | T   | <i>Acta Cryst. E</i> , 67, i39 (2011)                                                             |
| $\text{K}_3\text{Ln}[\text{OB}(\text{OH})_2]_2[\text{HOPO}_3]_2$ ( $\text{Ln}=\text{Yb, Lu}$ )                                             | 1:1     | M   | <i>J. Solid State Chem.</i> , 184, 1517-1522 (2011)                                               |
| $(\text{Ag}_{0.57}\text{Ni}_{0.22})\text{Ni}(\text{H}_2\text{O})_2[\text{BP}_2\text{O}_8]$                                                 | 1:2     | T   | <i>Acta Cryst. E</i> , 67, i44 (2011)                                                             |
| $\text{C}_4\text{H}_{24}\text{B}_4\text{Co}_2\text{N}_4\text{O}_{27}\text{P}_6$                                                            | 2:3     | T   | <i>J. Solid State Chem.</i> , 184, 2538-2542 (2011)                                               |
| $\text{Th}_2[\text{BO}_4][\text{PO}_4]$                                                                                                    | 1:1     | T   | <i>Can. Mineral.</i> , 49, 1211-1220 (2011)                                                       |
| $\text{LiZn}(\text{H}_2\text{O})_2(\text{BP}_2\text{O}_8)(\text{H}_2\text{O})$                                                             | 1:2     | T   | <i>Journal of Henan Polytechnic University (Natural Science)</i> (2011), 30(1), 100-103           |

|                                                                                                                               |      |   |                                                                                  |
|-------------------------------------------------------------------------------------------------------------------------------|------|---|----------------------------------------------------------------------------------|
| $(\text{H}_3\text{O})\text{Mg}(\text{H}_2\text{O})_2(\text{BP}_2\text{O}_8)(\text{H}_2\text{O})$                              | 1:2  | T | Journal of Henan Polytechnic University (Natural Science) (2011), 30(1), 100-103 |
| $\text{H}_{37}\text{B}_4\text{Mn}_4\text{N}_7\text{O}_{43}\text{P}_{10}$                                                      | 2:5  | T | Micropor. Mesopor. Mater. 147, 73-78 (2012)                                      |
| $(\text{Ag}_{0.79}\text{Co}_{0.11})\text{Co}(\text{H}_2\text{O})_2[\text{BP}_2\text{O}_8]0.67\text{H}_2\text{O}$              | 1:2  | T | Acta Cryst. E, 68, i3 (2012)                                                     |
| $\text{Ba}_5[(\text{UO}_2)(\text{PO}_4)_3(\text{B}_5\text{O}_9)]_n\text{H}_2\text{O}$                                         | 5:3  | M | Chem. Commun., 48, 3479-3481 (2012)                                              |
| $\text{KMnBP}_2\text{O}_7(\text{OH})_2$                                                                                       | 1:2  | T | Eur. J. Inorg. Chem., 3032-3038 (2012)                                           |
| $\text{KCo}(\text{H}_2\text{O})_2\text{BP}_2\text{O}_8 \cdot 0.48\text{H}_2\text{O}$                                          | 1:2  | T | Acta Cryst. C, 68, i55 (2012)                                                    |
| $\text{K}_{0.17}\text{Ca}_{0.42}\text{Co}(\text{H}_2\text{O})_2\text{BP}_2\text{O}_8 \cdot \text{H}_2\text{O}$                | 1:2  | T | Acta Cryst. C, 68, i55 (2012)                                                    |
| $\text{BiM}_2\text{BP}_2\text{O}_{10}$ ( $M = \text{Co}, \text{Ni}$ )                                                         | 1:2  | T | Inorg. Chem., 51, 8842-8847 (2012)                                               |
| $\text{Li}_2\text{Cs}_2\text{B}_2\text{P}_4\text{O}_{15}$                                                                     | 1:2  | T | Chem.-Eur. J., 18, 12046-12051 (2012)                                            |
| $\text{LiK}_2\text{BP}_2\text{O}_8$                                                                                           | 1:2  | T | Chem.-Eur. J., 18, 12046-12051 (2012)                                            |
| $\text{Li}_3\text{M}_2\text{BP}_4\text{O}_{14}$ ( $M = \text{K}, \text{Rb}$ )                                                 | 1:4  | T | Chem.-Eur. J., 18, 12046-12051 (2012)                                            |
| $\text{Na}_3\text{Cd}_3\text{B}(\text{PO}_4)_4$                                                                               | 1:4  | T | Inorg. Chem., 51, 10870-10875 (2012)                                             |
| $\text{K}(\text{Mn}(\text{H}_2\text{O})_2(\text{BP}_2\text{O}_8))(\text{H}_2\text{O})$                                        | 1:2  | T | Z. Krist.-New Cyst. St., 227(1), 3-4 (2012)                                      |
| $\text{Na}_{13}(\text{H}_3\text{O})_2[\text{B}_6\text{P}_{11}\text{O}_{42}(\text{OH})_2]\text{Cl}_2 \cdot \text{H}_2\text{O}$ | 6:11 | T | Crystengcomm. 15, 2048-2051 (2013)                                               |
| $\text{LiCu}_2[\text{BP}_2\text{O}_8(\text{OH})_2]$                                                                           | 1:2  | T | Dalton Trans., 42, 6298-6301 (2013)                                              |
| $\text{RbPbBP}_2\text{O}_8$                                                                                                   | 1:2  | T | Crystengcomm., 15, 4956-4962 (2013)                                              |
| $\text{KPbBP}_2\text{O}_8$                                                                                                    | 1:2  | T | Eur. J. Inorg. Chem., 3185-3190 (2013)                                           |
| $\text{Ba}_{11}\text{B}_{26}\text{O}_{44}(\text{PO}_4)_2(\text{OH})_6$                                                        | 13:1 | M | J. Solid State Chem., 203, 166-173 (2013)                                        |
| $\text{Mn}_3(\text{OH}_2)[\text{B}(\text{OH})_4][\text{PO}_4]$                                                                | 1:1  | T | Z. Kristallogr., 228, 509-519 (2013)                                             |
| $\text{KNi}_5[\text{P}_6\text{B}_6\text{O}_{23}(\text{OH})_{13}]$                                                             | 1:1  | T | Z. Kristallogr., 228, 509-519 (2013)                                             |
| $\text{Na}_{0.45}\text{K}(\text{MgNi,Al})\text{Ni}_2(\text{Ni,Al,Mg}_2)_2[\text{P}_6\text{B}_6\text{O}_{24}(\text{OH})_{12}]$ | 1:1  | T | Z. Kristallogr., 228, 509-519 (2013)                                             |
| $\text{Li}_3\text{BP}_2\text{O}_8$                                                                                            | 1:2  | T | Dalton Trans., 43, 2294-2300 (2014)                                              |
| $\text{Cu}_3[\text{B}_2\text{P}_3\text{O}_{12}(\text{OH})_3]$                                                                 | 1:2  | T | J. Solid State Chem., 210, 60-64 (2014)                                          |

---

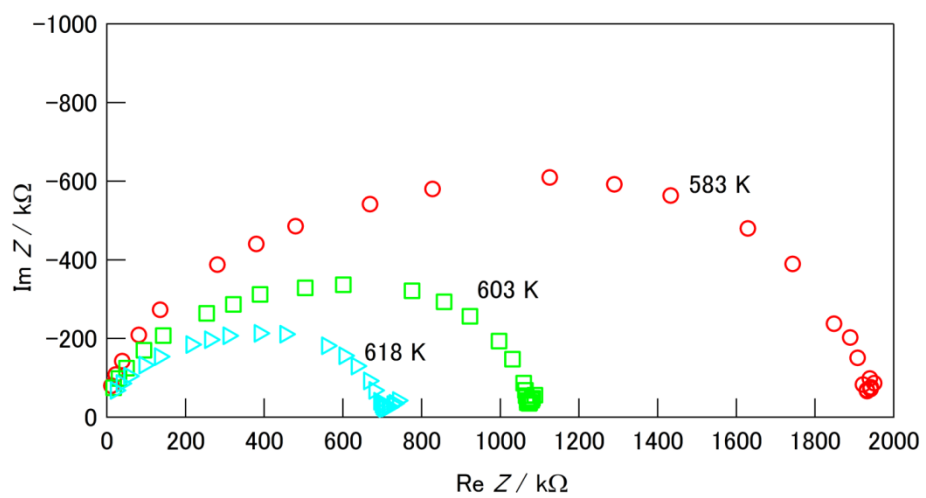

**Fig. S1** Complex impedance plots for a polycrystalline  $\text{Li}_2\text{B}_3\text{PO}_8$  sample at 583, 603, and 618 K.

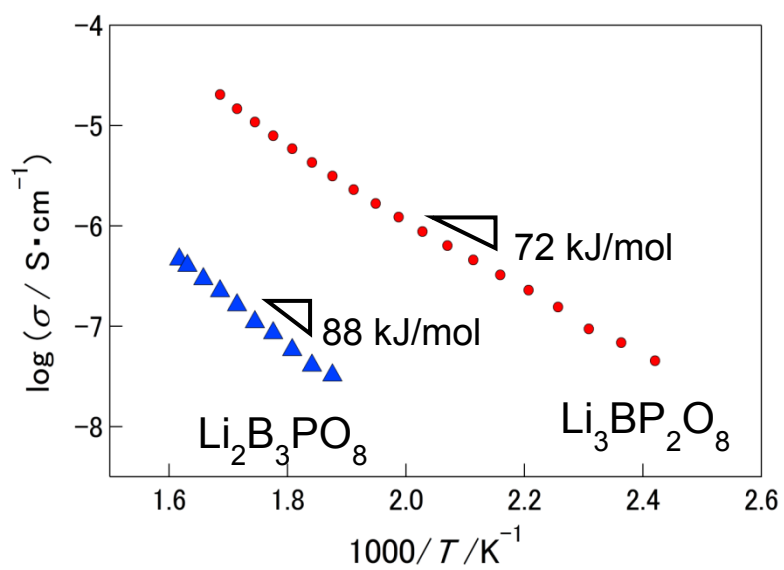

**Fig. S2** Arrhenius plots of the conductivities of  $\text{Li}_2\text{B}_3\text{PO}_8$  and  $\text{Li}_3\text{BP}_2\text{O}_8$  <sup>S2</sup> measured by the AC impedance method

(S2) T. Hasegawa and H. Yamane, *Dalton. Trans.*, 2014, **43**, 2294.
